# Supplementary material for: Colorimetric and fluorimetric detection of fluoride and cyanide ions using tri and tetra coordinated boron containing chromophores
Source: Royal Society of Chemistry journal article supplement (doi:10.1039/c5dt02356d), 2015-01-01
Supplement: c5dt02356d1.pdf [file c5dt02356d1.pdf]

## Supporting Information

### Colorimetric and Fluorimetric Detection of Fluoride and Cyanide Ions Using Tri and Tetra Coordinated Boron Containing Chromophores

Rajneesh Misra,\* Thaksen Jadhav, Bhausahab Dhokale, and Shaikh M. Mobin

Department of Chemistry, Indian Institute of Technology Indore,

Indore-452017, Madhya Pradesh, India

E-mail address: rajneeshmisra@iiti.ac.in

#### Contents

1. X-ray crystallographic analysis.
2. Thermogravimetric analysis (TGA).
3. Anion-sensing properties.
4. Copies of NMR and Mass spectra of new compounds.
5. DFT Calculations.

## 1. X-ray crystallographic analysis

Single crystal X-ray structural studies of **3** were performed on a CCD Agilent Technologies (Oxford Diffraction) SUPER NOVA diffractometer. Data were collected at 150(2) K using graphite-monochromated Mo K $\alpha$  radiation ( $\lambda_{\alpha} = 0.71073 \text{ \AA}$ ). The strategy for the Data collection was evaluated by using the CrysAlisPro CCD software. The data were collected by the standard 'phi-omega scan techniques, and were scaled and reduced using CrysAlisPro RED software. The structures were solved by direct methods using SHELXS-97, and refined by full matrix least-squares with SHELXL-97, refining on  $F^2$ . The crystal refinement data are summarized in Table 1. The CCDC numbers **967476 and 1043936** contain the supplementary crystallographic data for **3** and **4**. These data can be obtained free of charge via [www.ccdc.cam.ac.uk](http://www.ccdc.cam.ac.uk) (or from the Cambridge Crystallographic Data Centre, 12 union Road, Cambridge CB21 EZ, UK; Fax: (+44) 1223-336-033; or [deposit@ccdc.cam.ac.uk](mailto:deposit@ccdc.cam.ac.uk)).

**Table S1. Crystal data and structure refinement parameters**

| Compounds                                      | <b>3</b>              | <b>4</b>              |
|------------------------------------------------|-----------------------|-----------------------|
| Empirical formula                              | C38 H48 B2 Cl2 N2     | C35 H32 B2 F2 N2      |
| Crystal size                                   | 0.33 x 0.26 x 0.21 mm | 0.13 x 0.09 x 0.05 mm |
| Crystal system                                 | Monoclinic            | Monoclinic            |
| Space group                                    | $P 2_1/n$             | $P 2_1/n$             |
| Formula weight                                 | 625.30                | 540.25                |
| $T, K$                                         | 150(2) K              | 150(2) K              |
| $\theta$ range for data collection/ $^{\circ}$ | 3.13 to 24.99 deg.    | 3.75 to 71.46 deg.    |
| $a$ ( $\text{\AA}$ )                           | 8.9225(3)             | 13.8290(4)            |
| $b$ ( $\text{\AA}$ )                           | 9.5404(3)             | 16.4725(3)            |
| $c$ ( $\text{\AA}$ )                           | 42.2003(11)           | 14.2509(3)            |
| $\alpha$ / $^{\circ}$                          | 76.110(10)            | 90                    |

|                                                 |                                                   |                           |
|-------------------------------------------------|---------------------------------------------------|---------------------------|
| $\beta/^\circ$                                  | 87.689(11)                                        | 114.352(3)                |
| $\gamma/^\circ$                                 | 71.391(12)                                        | 90                        |
| <b>Z</b>                                        | 4                                                 | 4                         |
| <b>F(000)</b>                                   | 1336                                              | 1136                      |
| <b>V (Å<sup>3</sup>)</b>                        | 3592.25(19)                                       | 2957.50(12)               |
| <b>D<sub>calc</sub>, Mg m<sup>-3</sup></b>      | 1.156                                             | 1.213                     |
| <b>Collected refins</b>                         | 26185                                             | 20171                     |
| <b>Unique refins</b>                            | 6330 [R(int) = 0.0428]                            | 5690 [R(int) = 0.0378]    |
| <b>Data/restrains/paramiters</b>                | 6330 / 0 / 405                                    | 5690 / 0 / 376            |
| <b>Goodness-of-fit on F<sup>2</sup></b>         | 1.024                                             | 1.069                     |
| <b>Final R indices [I&gt;2σ(I)]<sup>6</sup></b> | R <sub>1</sub> = 0.0670, wR <sub>2</sub> = 0.1763 | R1 = 0.0669, wR2 = 0.2028 |
| <b>R indices (all data)</b>                     | R <sub>1</sub> = 0.0874, wR <sub>2</sub> = 0.1946 | R1 = 0.0831, wR2 = 0.2224 |

**Table S2. Selected bond lengths and angles of pyrazabole 3**

| pyrazabole 3     |          |                  |          |
|------------------|----------|------------------|----------|
| Bond lengths (Å) |          | Bond angles °    |          |
| B(2)-N(1)        | 1.586(4) | N(1)-B(2)-N(2)#1 | 104.8(2) |
| B(2)-N(2)#1      | 1.590(4) | N(1)-B(2)-C(1)   | 110.4(2) |
| B(2)-C(1)        | 1.596(4) | N(2)#1-B(2)-C(1) | 110.9(2) |
| B(2)-C(5)        | 1.641(4) | N(1)-B(2)-C(5)   | 105.6(2) |
| B(1)-C(17)       | 1.566(4) | N(2)#1-B(2)-C(5) | 107.7(2) |
| B(1)-C(20)       | 1.573(4) | C(17)-B(1)-C(20) | 117.8(2) |
| B(1)-C(29)       | 1.575(4) | C(17)-B(1)-C(29) | 117.2(2) |
| N(1)-C(10)       | 1.335(3) | C(20)-B(1)-C(29) | 125.0(2) |
| N(1)-N(2)        | 1.366(3) |                  |          |
| N(2)-C(9)        | 1.337(3) |                  |          |

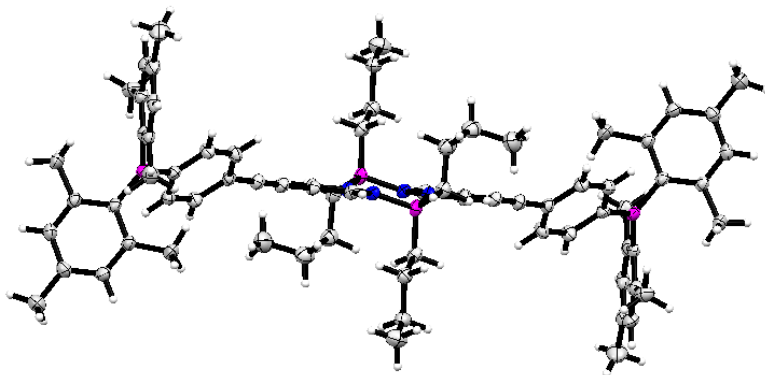

**Fig. S1** Crystal structure of **3**.

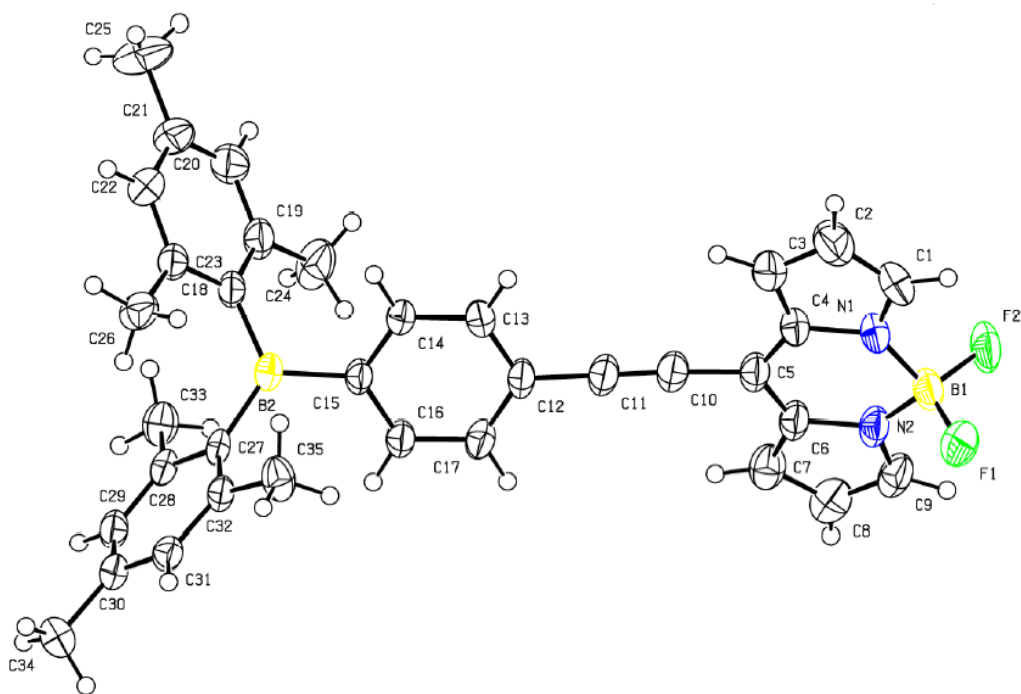

**Fig. S2** Crystal structure of **4**.

**Table S3.** Important distance and angle of intermolecular interactions of **3**.

| Interaction                                   | Distance (Å) |
|-----------------------------------------------|--------------|
| C(36)-H(36B)--- $\pi$ (mesityl ring centroid) | 3.147        |
| C(26)-H(26c)---Cl(2)                          | 2.869        |

**Table S4.** Important distance and angle of intermolecular interactions of **4**.

| Interaction                                                  | Distance (Å) |
|--------------------------------------------------------------|--------------|
| C(17)-H(17) --- F(1)                                         | 2.653        |
| C(7)-H(7) --- F(1)                                           | 2.646        |
| C(3)-H(3) --- F(2)                                           | 2.421        |
| C(13)-H(13) --- F(2)                                         | 2.466        |
| C(22)-H(22) --- $\pi$ (C12, C13, C14, C15, C16, C17)         | 3.021        |
| Two pyrrole ring $\pi$ --- $\pi$ (C6, C7, C8, C9, N2)        | 3.689        |
| B-mesityl C(1)-H(1) --- $\pi$ (C27, C28, C29, C30, C31, C32) | 3.172        |
| C(34A)-H(34A) --- $\pi$ (C18, C19, C20, C21, C22, C23)       | 2.892        |
| C(34B)-H(34B) --- $\pi$ (C1, C2, C3, C4, N1)                 | 3.214        |

## 2. Thermogravimetric analysis (TGA)

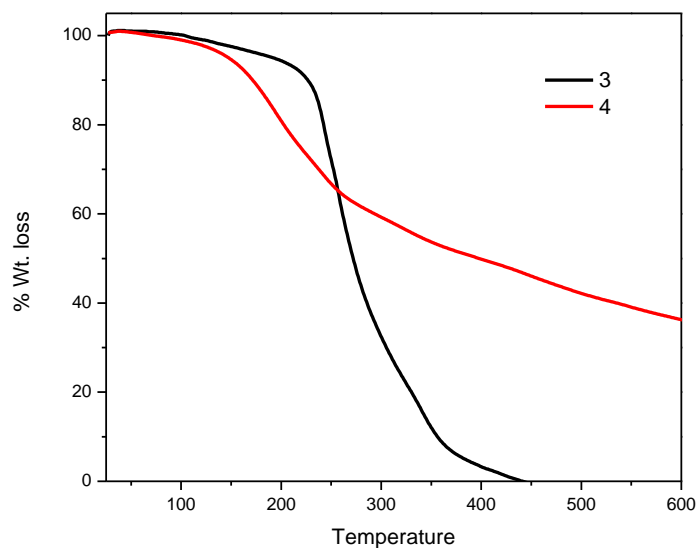

**Fig. S3** Thermogravimetric analysis of **3** and **4**, measured at a heating rate of 10 °C/ min under nitrogen atmosphere.

### 3. Anion-sensing properties

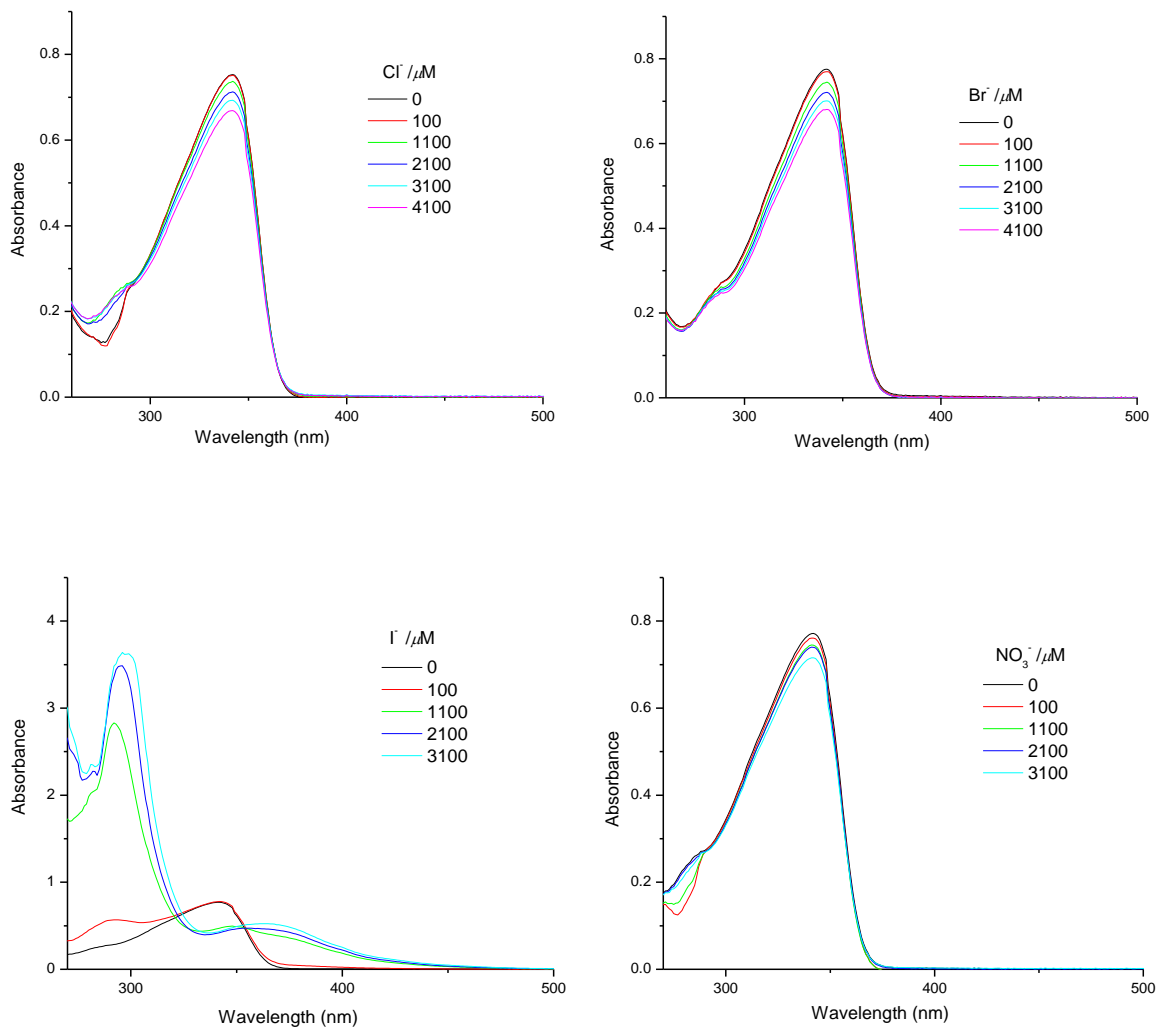

**Fig. S4** Spectral changes in UV-vis absorption spectra of **3** (10 μM) at 25 °C in THF upon the addition of various anions with THF solutions of their Bu<sub>4</sub>N<sup>+</sup> salts.

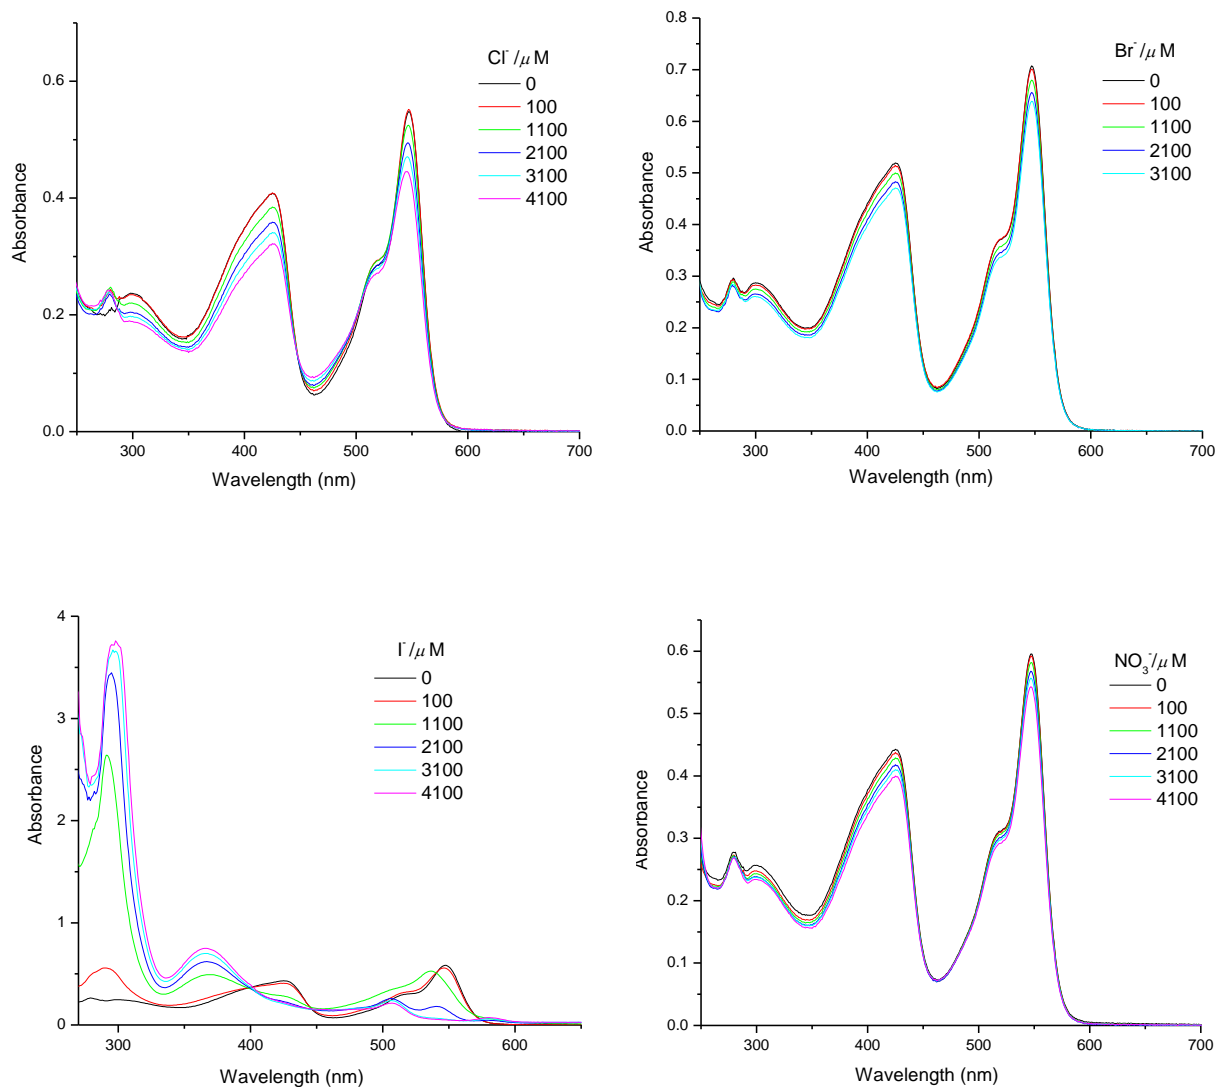

**Fig. S5** Spectral changes in UV-vis absorption spectra of **4** (10 μM) at 25 °C in THF upon the addition of various anions with THF solutions of their Bu<sub>4</sub>N<sup>+</sup> salts.

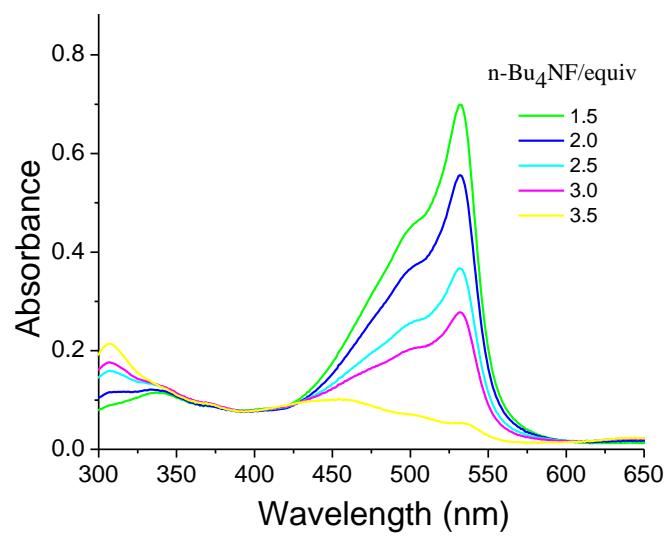

**Fig. S6** Spectral changes in UV-vis absorption spectra of **4** upon the addition of 1.5-3.5 equiv of TBAF.



**Job's plot:**

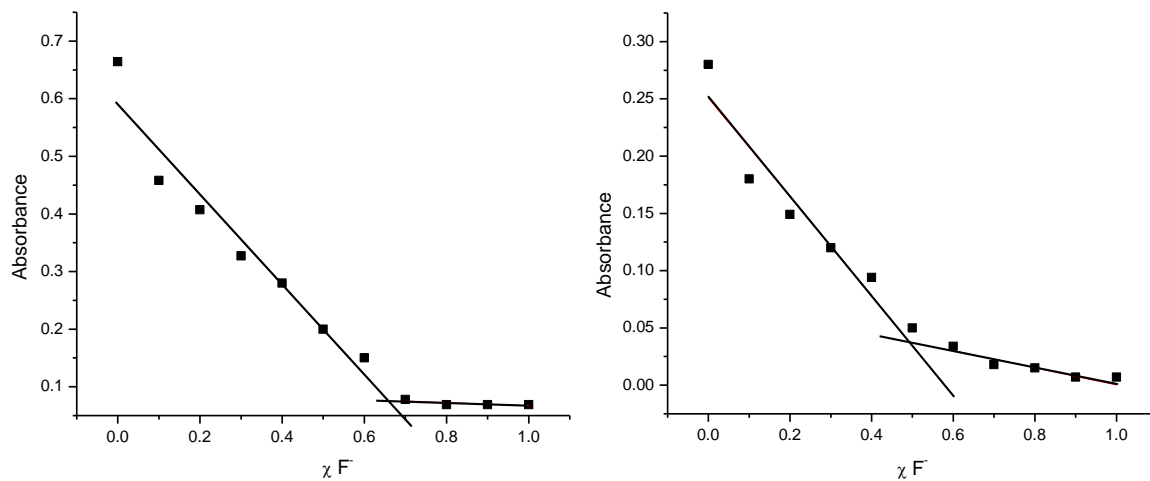

**Fig. S7** Job plot of **3** with TBAF ion, equimolar solutions ( $1.0 \times 10^{-5}$  M) of **1** and TBAF in THF were used, **3** (left, at  $\lambda_{ab} = 342$  nm) and **4** (right, at  $\lambda_{ab} = 427$  nm).

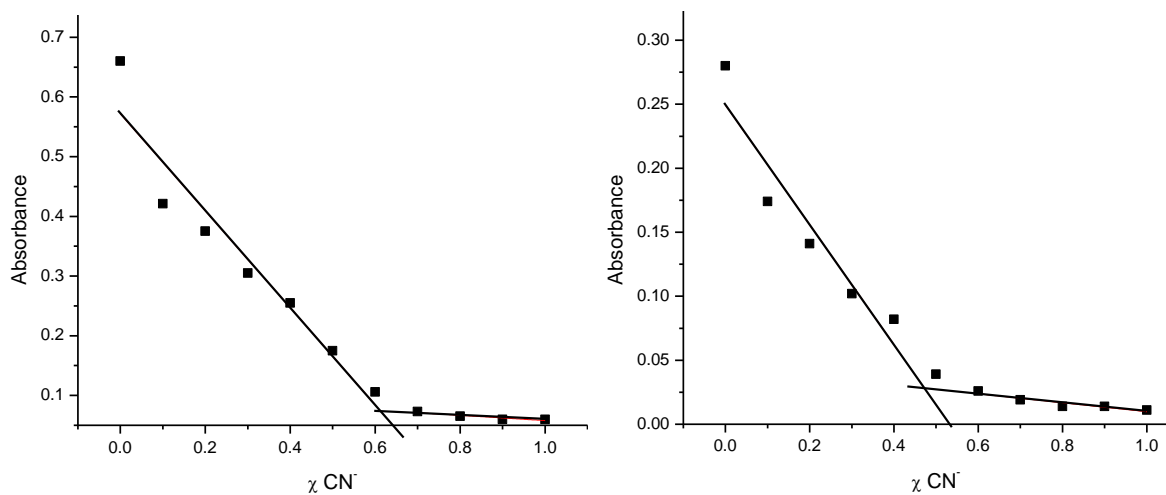

**Fig. S8** Job plot of **3** and **4** with TBACN ion, equimolar solutions ( $1.0 \times 10^{-5}$  M) of **3/4** and TBAF in THF were used, **3** (left, at  $\lambda_{ab} = 342$  nm) and **4** (right, at  $\lambda_{ab} = 427$  nm).

## Binding constant fitting plots:

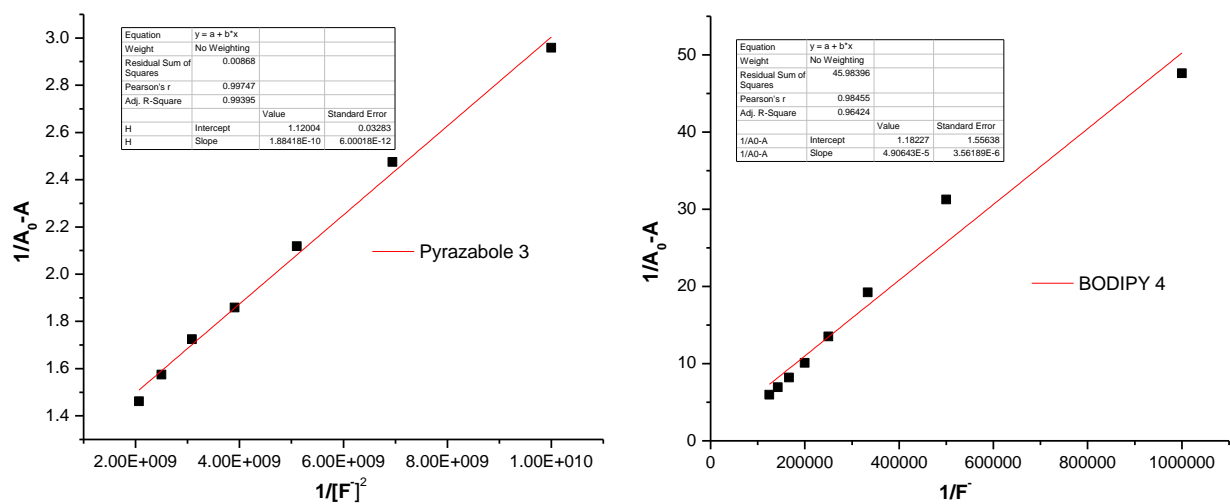

**Fig. S9** Fitting of UV-Vis absorption titration of **3** (left, at  $\lambda_{ab} = 342$  nm) and **4** (right, at  $\lambda_{ab} = 427$  nm) with fluoride ions.

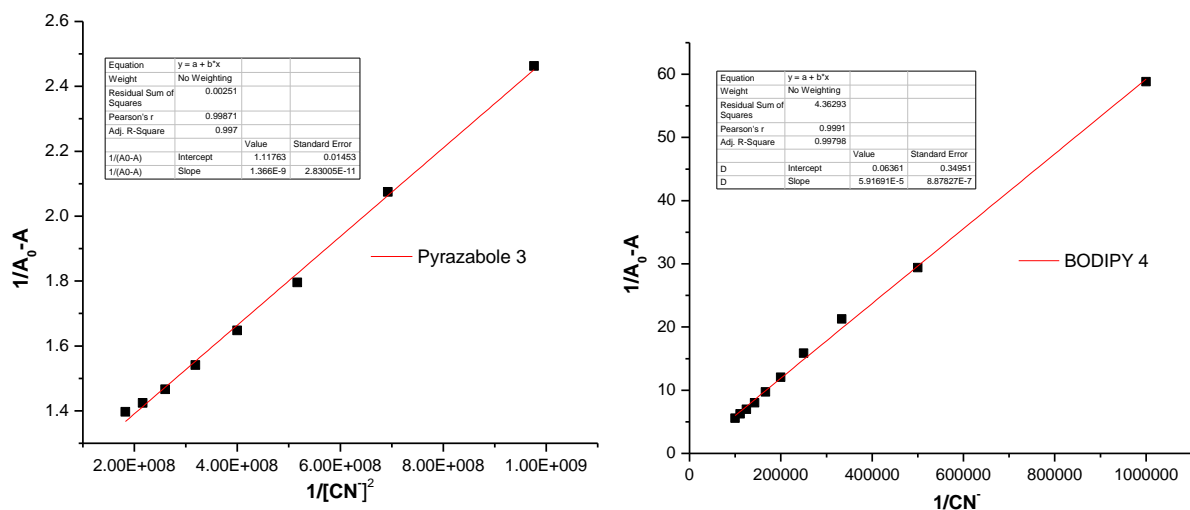

**Fig. S10** Fitting of UV-Vis absorption titration of **3** (left, at  $\lambda_{ab} = 342$  nm) and **4** (right, at  $\lambda_{ab} = 427$  nm) with cyanide ions.

#### 4. Copies of NMR and Mass spectra of new compounds

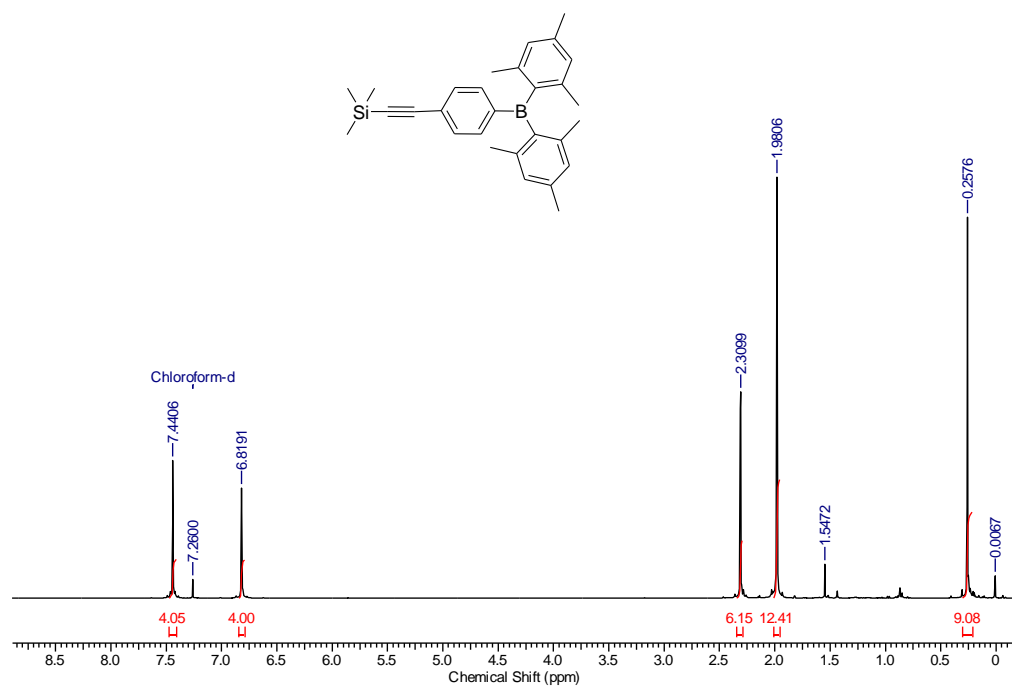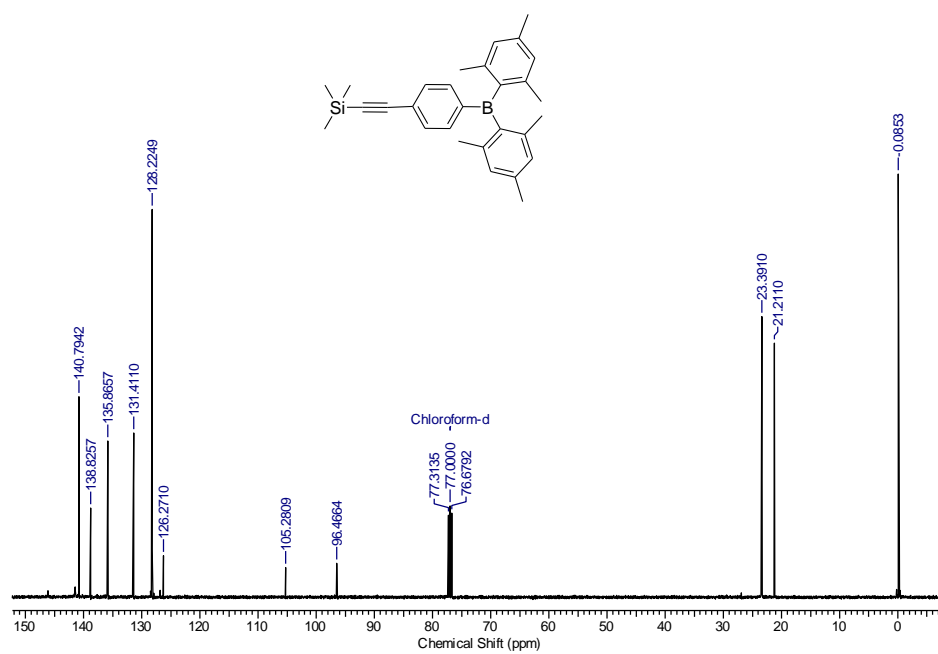

**Fig. S11** <sup>1</sup>H and <sup>13</sup>C-NMR spectrum of (4-trimethylsilylethynyl-phenyl) dimesitylborane.

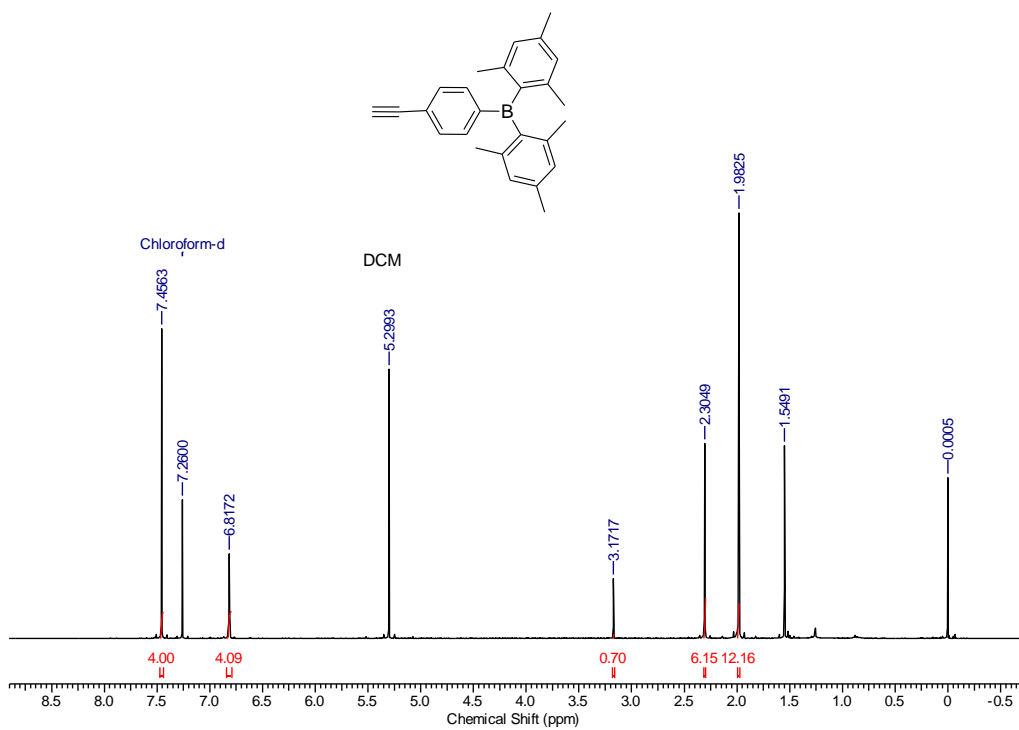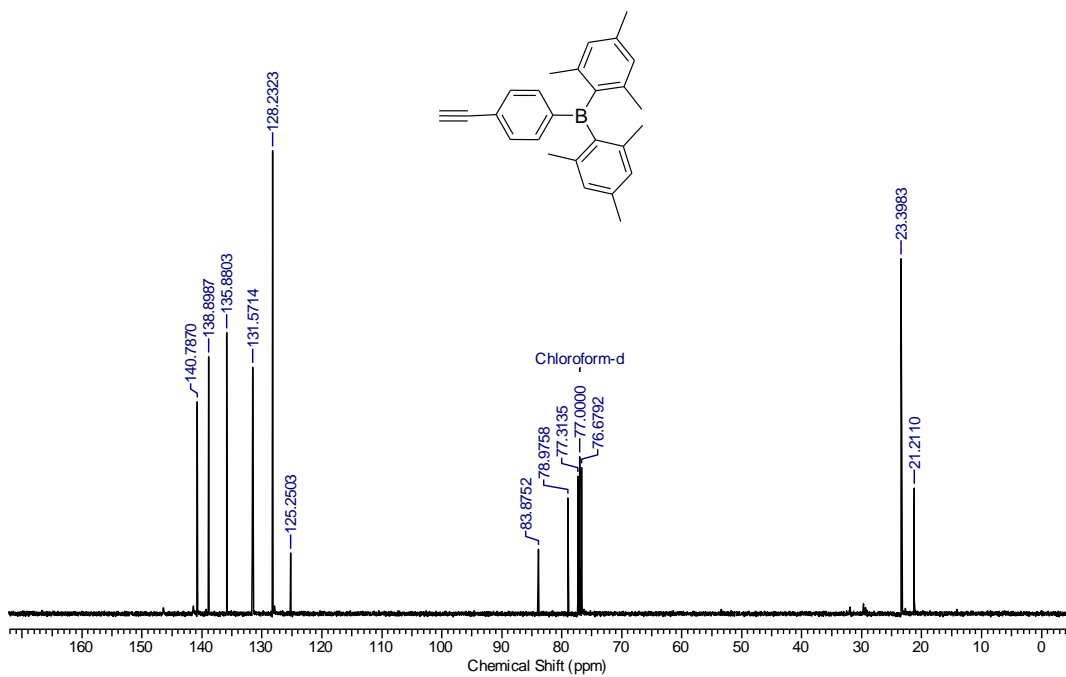

**Fig. S12** <sup>1</sup>H and <sup>13</sup>C-NMR spectrum of (4-Ethynyl-phenyl)-dimesitylborane **2**.

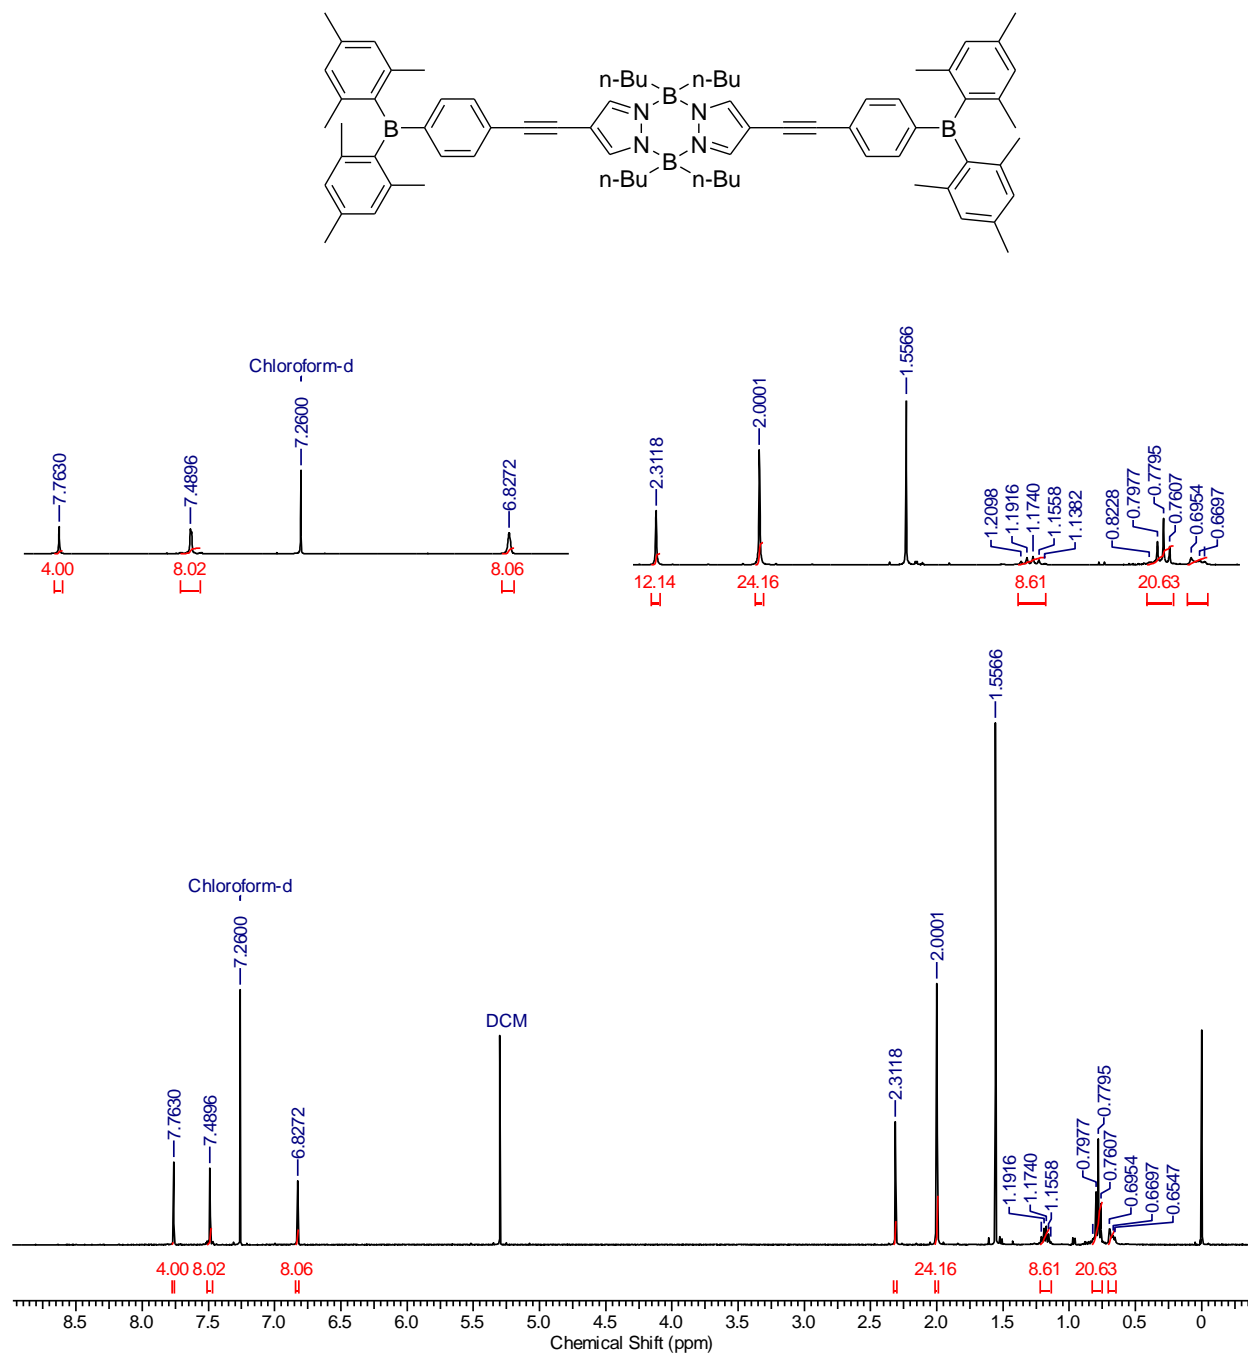

**Fig. S13**  $^1\text{H-NMR}$  spectrum of pyrazabole 3.

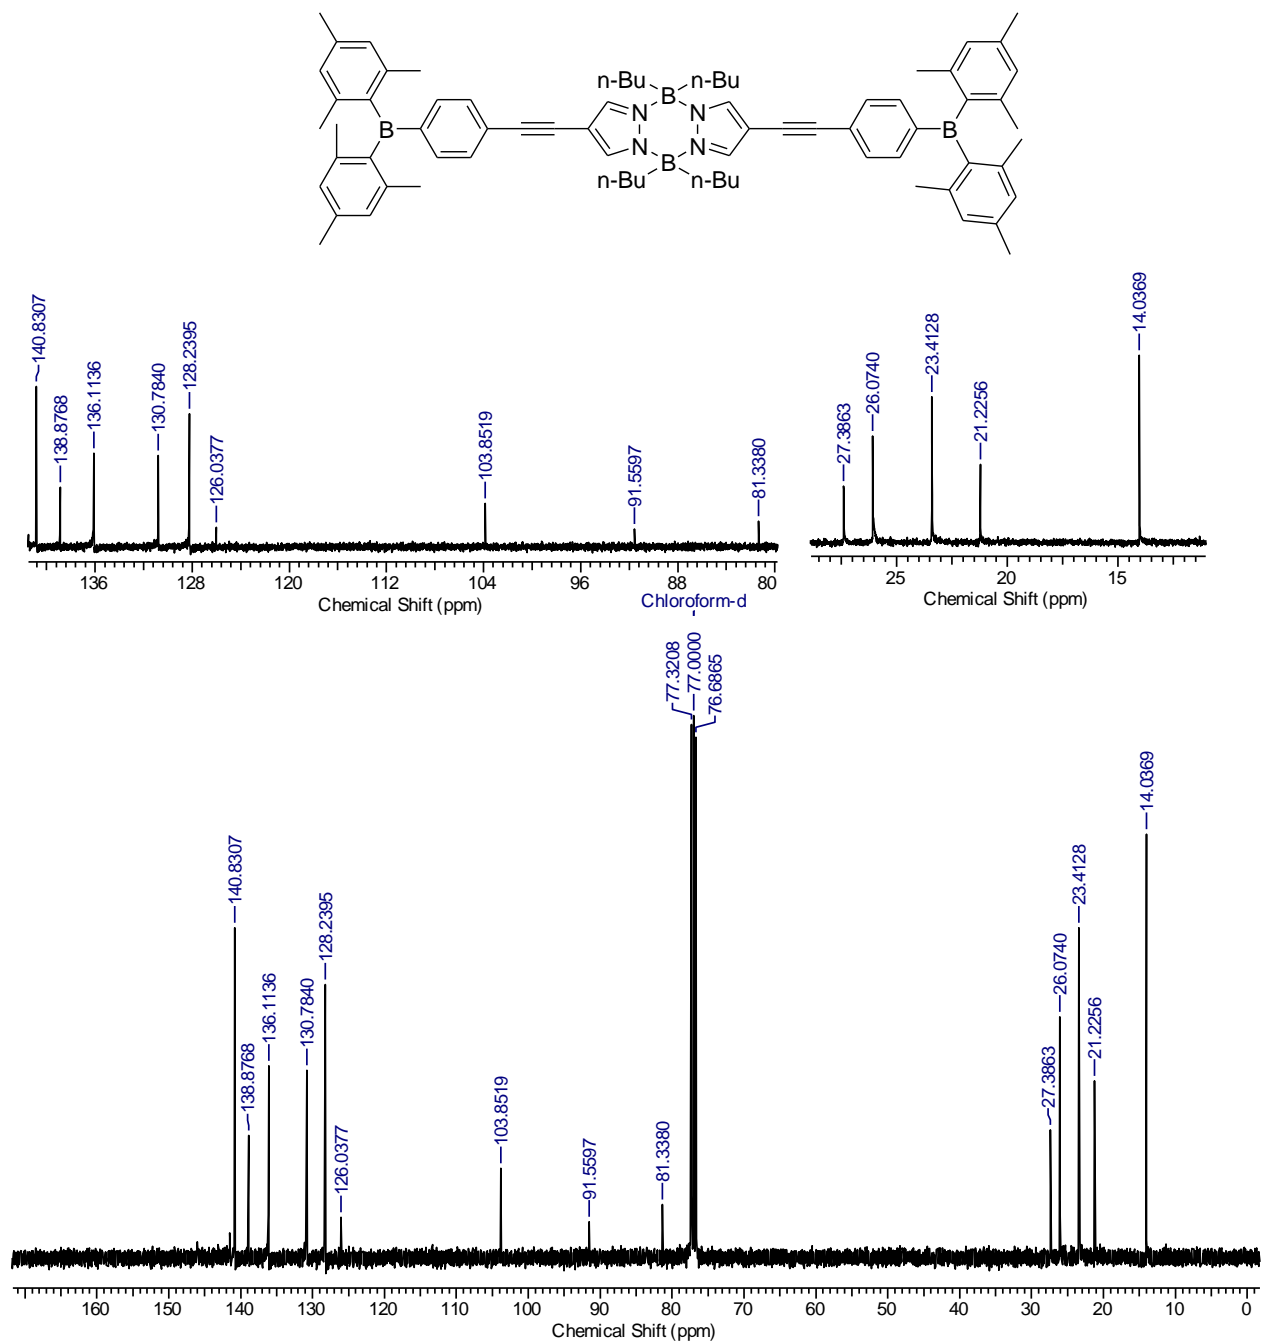

Fig. S14  $^{13}\text{C}$ -NMR spectrum of pyrazabole 3.

## Display Report

### Analysis Info

Analysis Name D:\Data\October 2013\IRM-TJ-02-61 25-10-2013.d  
Method tune\_high.m  
Sample Name blank  
Comment

Acquisition Date 10/25/2013 4:59:21 PM

Operator Ghanashyam Bhavsar  
Instrument micrOTOF-Q II 10348

### Acquisition Parameter

|             |            |                       |            |                  |           |
|-------------|------------|-----------------------|------------|------------------|-----------|
| Source Type | ESI        | Ion Polarity          | Positive   | Set Nebulizer    | 0.4 Bar   |
| Focus       | Not active | Set Capillary         | 4500 V     | Set Dry Heater   | 220 °C    |
| Scan Begin  | 50 m/z     | Set End Plate Offset  | -500 V     | Set Dry Gas      | 4.0 l/min |
| Scan End    | 3000 m/z   | Set Collision Cell RF | 1600.0 Vpp | Set Divert Valve | Waste     |

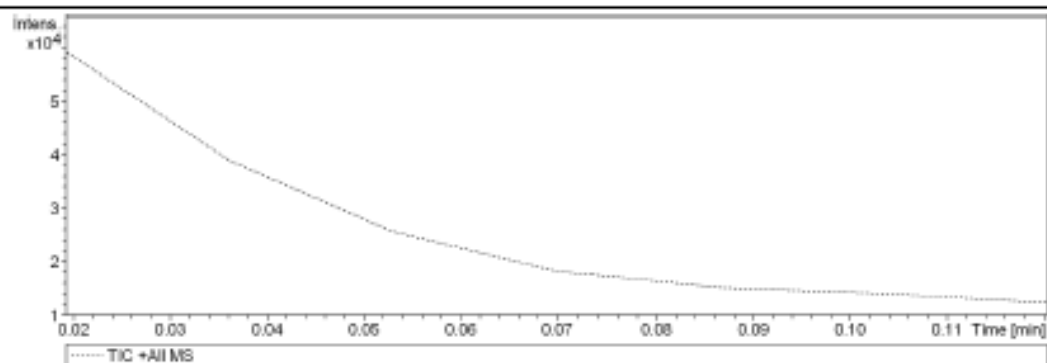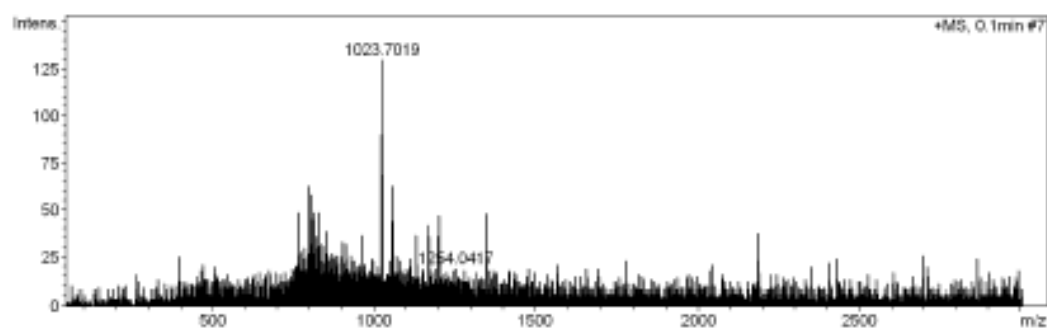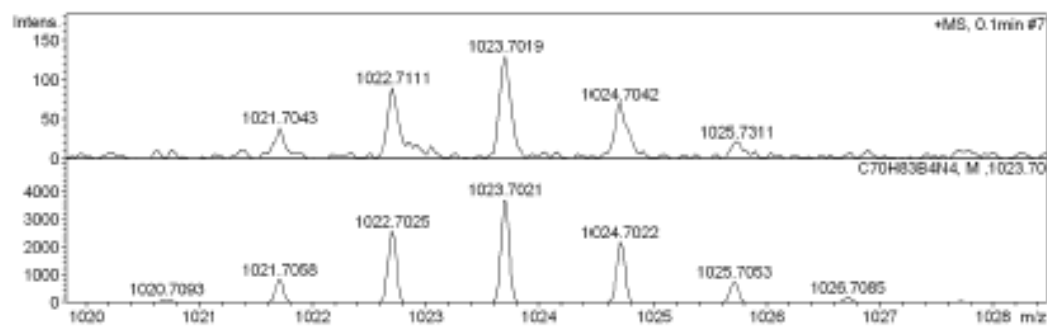

Fig. S15 HRMS spectrum of pyrazabole 3.

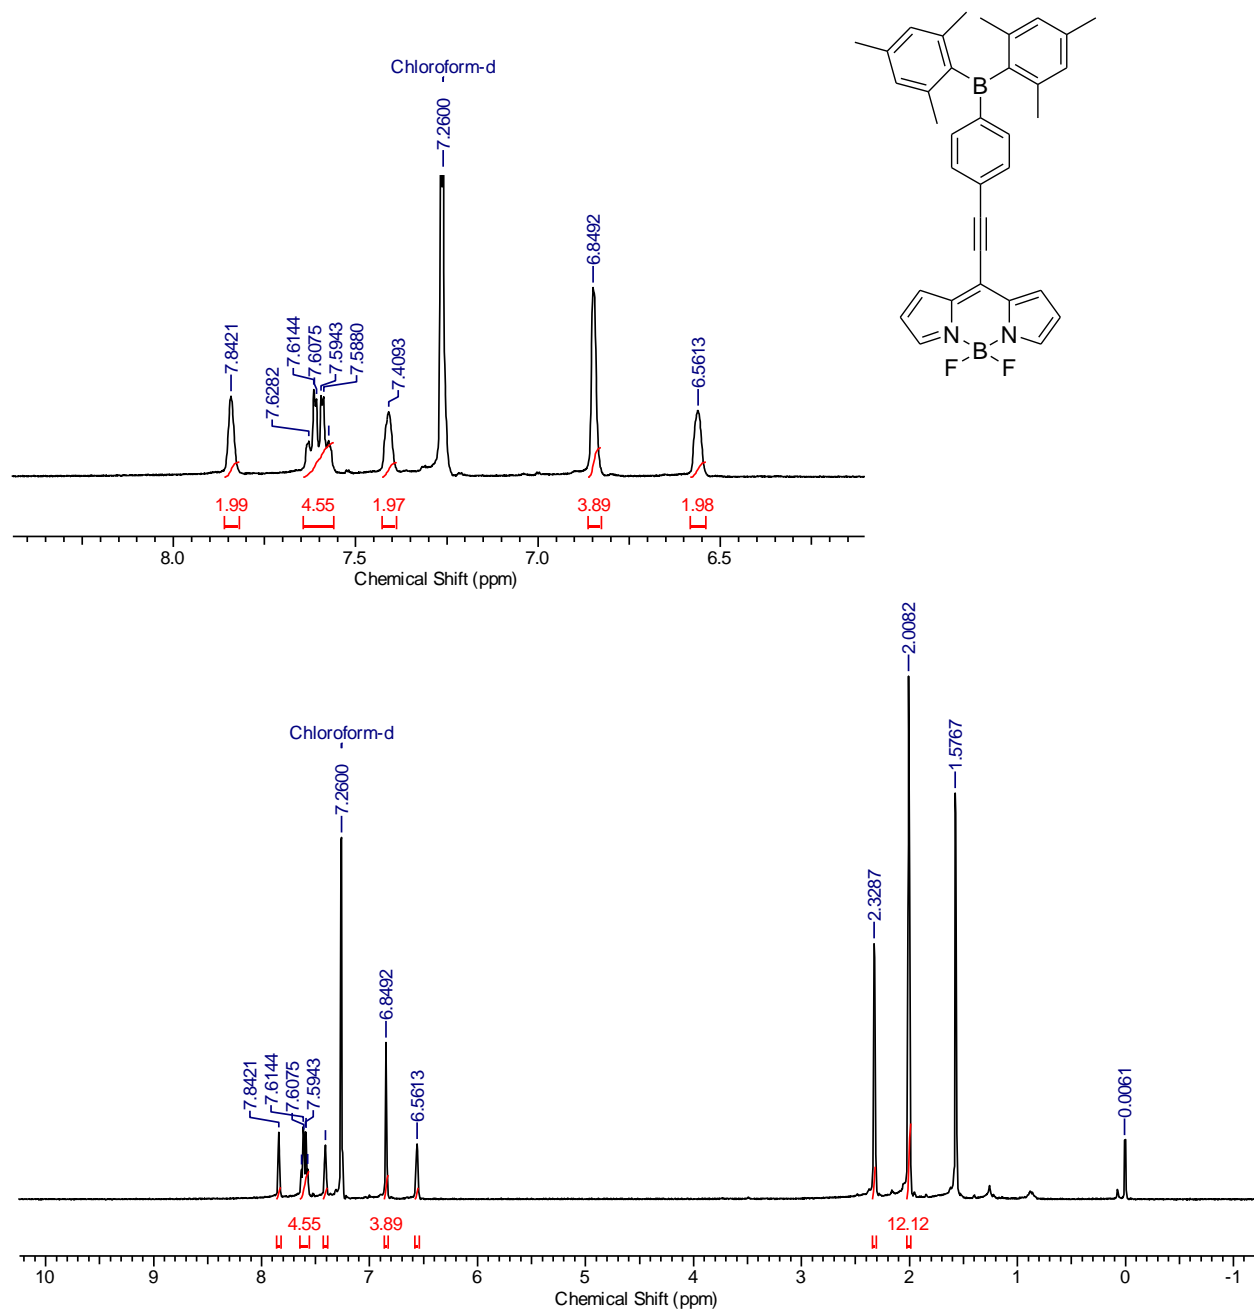

**Fig. S16**  $^1\text{H-NMR}$  spectrum of BODIPY 4.



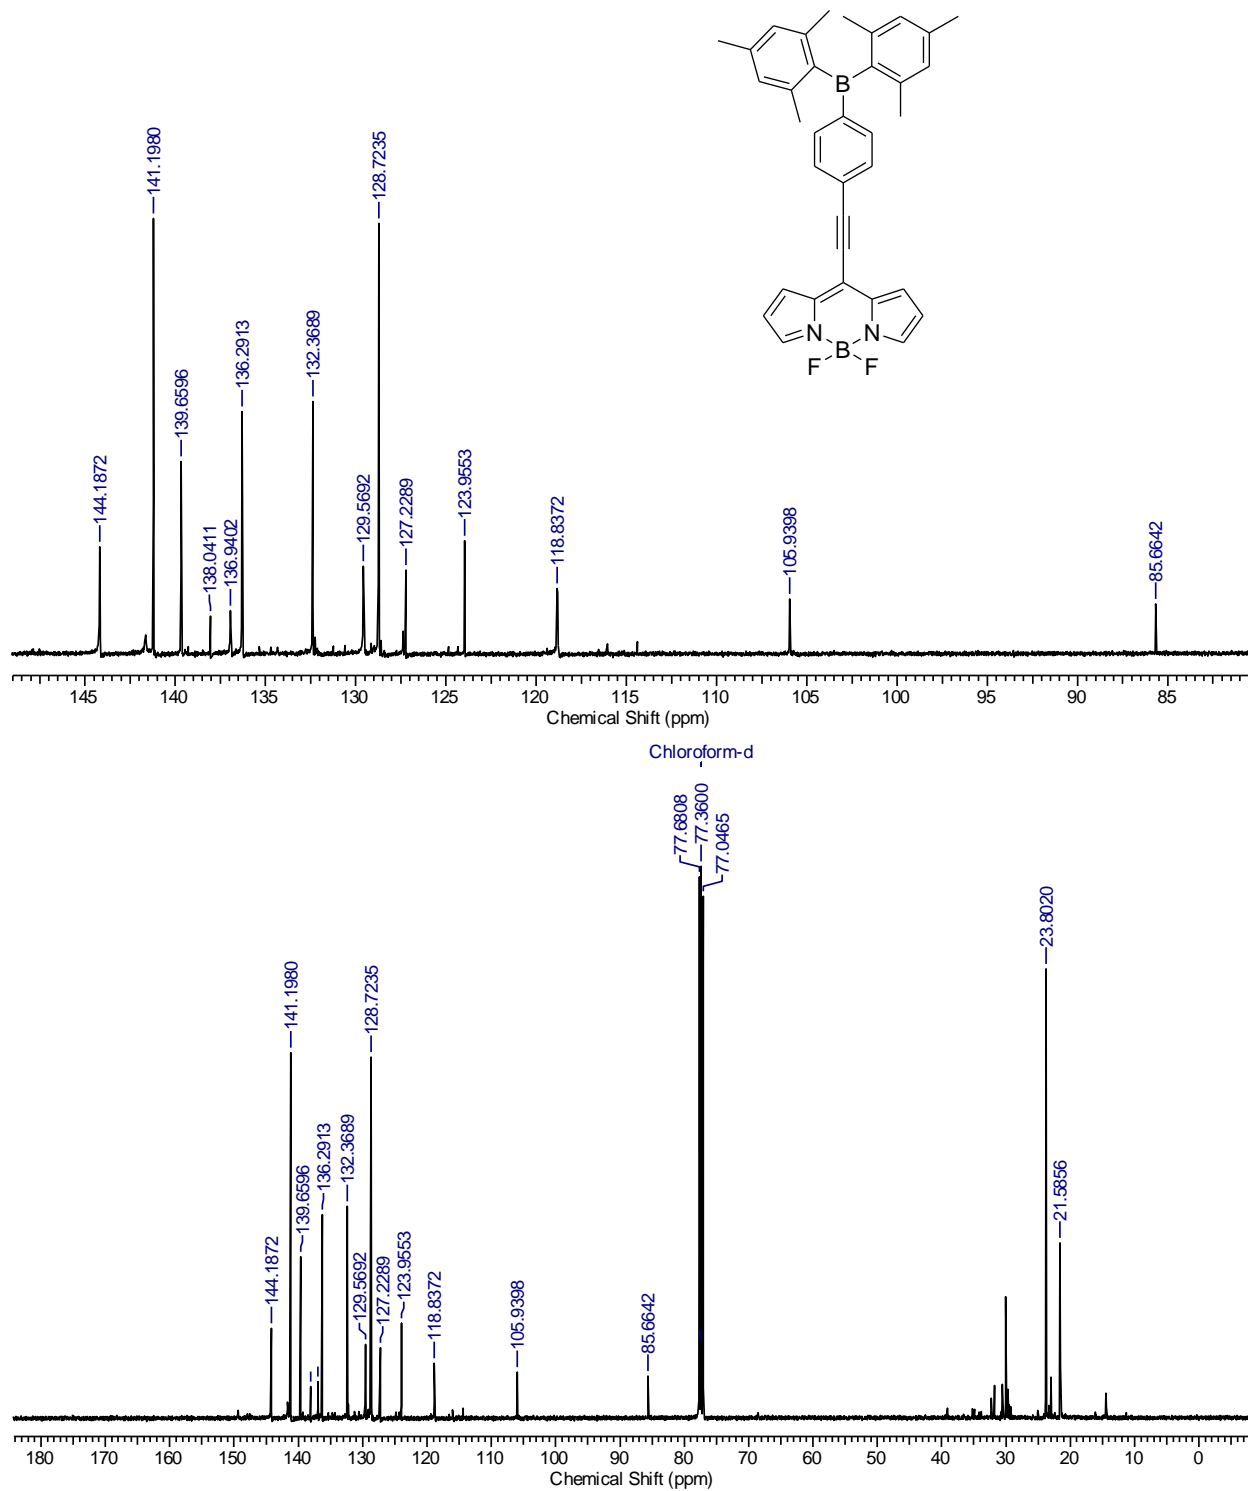

**Fig. S17**  $^{13}\text{C}$ -NMR spectrum of BODIPY 4.

## Display Report

|                      |                                               |                         |                       |
|----------------------|-----------------------------------------------|-------------------------|-----------------------|
| <b>Analysis Info</b> |                                               | <b>Acquisition Date</b> | 8/13/2013 10:40:10 AM |
| <b>Analysis Name</b> | D:\Data\August 2013\RM-BD-02-211 13-08-2013.d | <b>Operator</b>         | Ghanashyam Bhavsar    |
| <b>Method</b>        | tune_wide.m                                   | <b>Instrument</b>       | micrOTOF-Q II 10348   |
| <b>Sample Name</b>   | 0                                             |                         |                       |
| <b>Comment</b>       |                                               |                         |                       |

### Acquisition Parameter

|                    |            |                              |           |                         |           |
|--------------------|------------|------------------------------|-----------|-------------------------|-----------|
| <b>Source Type</b> | ESI        | <b>Ion Polarity</b>          | Positive  | <b>Set Nebulizer</b>    | 0.4 Bar   |
| <b>Focus</b>       | Not active | <b>Set Capillary</b>         | 4500 V    | <b>Set Dry Heater</b>   | 220 °C    |
| <b>Scan Begin</b>  | 50 m/z     | <b>Set End Plate Offset</b>  | -500 V    | <b>Set Dry Gas</b>      | 3.0 l/min |
| <b>Scan End</b>    | 3000 m/z   | <b>Set Collision Cell RF</b> | 650.0 Vpp | <b>Set Divert Valve</b> | Waste     |

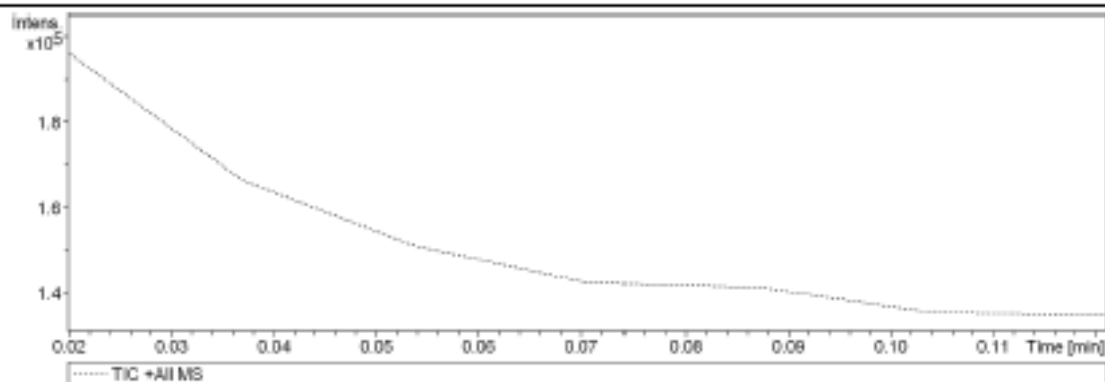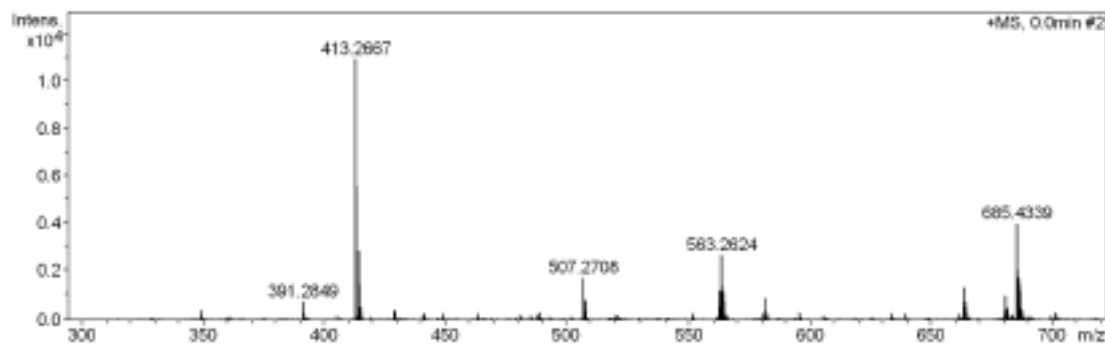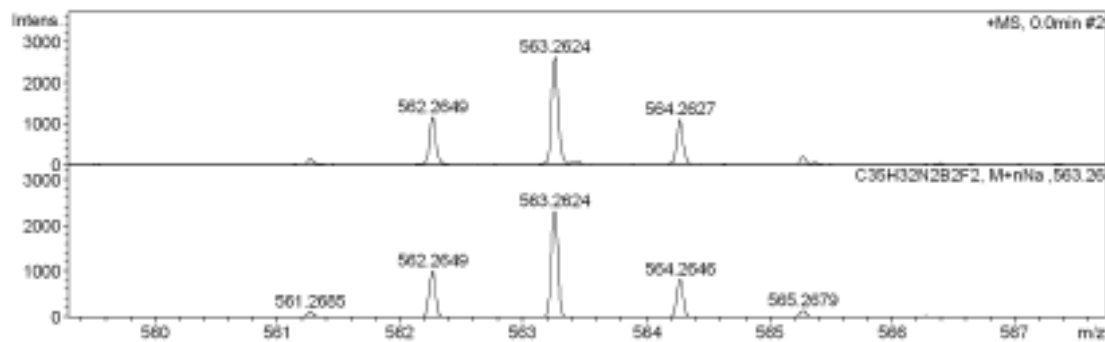

Fig. S18 HRMS spectrum of BODIPY 4.

## 5. DFT Calculations

### Pyrazabole 3.

Standard orientation:

| Center<br>Number | Atomic<br>Number | Atomic<br>Type | Coordinates (Angstroms) |           |           |
|------------------|------------------|----------------|-------------------------|-----------|-----------|
|                  |                  |                | X                       | Y         | Z         |
| 1                | 5                | 0              | 11.877391               | 0.004276  | -0.090516 |
| 2                | 5                | 0              | -0.005174               | 1.479101  | -0.677233 |
| 3                | 7                | 0              | 1.265175                | 0.679537  | -0.133677 |
| 4                | 7                | 0              | 1.272424                | -0.637193 | 0.210797  |
| 5                | 6                | 0              | -0.022518               | 2.978562  | -0.051952 |
| 6                | 1                | 0              | 0.828485                | 3.536700  | -0.471591 |
| 7                | 1                | 0              | -0.904322               | 3.516367  | -0.435813 |
| 8                | 6                | 0              | -0.008686               | 3.094033  | 1.483419  |
| 9                | 1                | 0              | 0.905385                | 2.628507  | 1.880882  |
| 10               | 1                | 0              | -0.842335               | 2.508909  | 1.897041  |
| 11               | 6                | 0              | -0.109633               | 4.529262  | 2.030356  |
| 12               | 1                | 0              | -1.028677               | 4.997209  | 1.647964  |
| 13               | 1                | 0              | -0.224235               | 4.483538  | 3.122325  |
| 14               | 6                | 0              | 1.090584                | 5.422989  | 1.696600  |
| 15               | 1                | 0              | 2.024532                | 4.984127  | 2.070988  |
| 16               | 1                | 0              | 0.984573                | 6.414136  | 2.152735  |
| 17               | 1                | 0              | 1.202204                | 5.569667  | 0.616323  |
| 18               | 6                | 0              | 0.071989                | 1.407103  | -2.309740 |
| 19               | 1                | 0              | 1.034949                | 1.850633  | -2.611351 |
| 20               | 1                | 0              | 0.128030                | 0.353590  | -2.629324 |
| 21               | 6                | 0              | -1.040090               | 2.102824  | -3.111338 |
| 22               | 1                | 0              | -1.109684               | 3.160588  | -2.816494 |
| 23               | 1                | 0              | -2.016015               | 1.655069  | -2.871540 |
| 24               | 6                | 0              | -0.838963               | 2.030157  | -4.632681 |
| 25               | 1                | 0              | 0.130101                | 2.481650  | -4.889207 |
| 26               | 1                | 0              | -0.771195               | 0.975790  | -4.936378 |
| 27               | 6                | 0              | -1.951779               | 2.721243  | -5.427481 |
| 28               | 1                | 0              | -2.928839               | 2.267445  | -5.219123 |
| 29               | 1                | 0              | -1.777099               | 2.651619  | -6.507485 |
| 30               | 1                | 0              | -2.021278               | 3.785697  | -5.170115 |
| 31               | 6                | 0              | 2.546849                | -1.044163 | 0.301314  |
| 32               | 1                | 0              | 2.785510                | -2.057338 | 0.583222  |
| 33               | 6                | 0              | 2.534636                | 1.090752  | -0.262629 |
| 34               | 1                | 0              | 2.759774                | 2.102561  | -0.562494 |
| 35               | 6                | 0              | 3.407048                | 0.025784  | 0.008032  |
| 36               | 6                | 0              | 4.819768                | 0.026501  | -0.011822 |
| 37               | 6                | 0              | 6.035771                | 0.024070  | -0.028173 |
| 38               | 6                | 0              | 7.458633                | 0.019269  | -0.045730 |
| 39               | 6                | 0              | 8.178108                | -1.133360 | 0.332897  |
| 40               | 1                | 0              | 7.632495                | -2.019895 | 0.642208  |
| 41               | 6                | 0              | 9.566788                | -1.132797 | 0.301016  |

|    |   |   |            |           |           |
|----|---|---|------------|-----------|-----------|
| 42 | 1 | 0 | 10.101213  | -2.036509 | 0.582519  |
| 43 | 6 | 0 | 10.306299  | 0.009128  | -0.077079 |
| 44 | 6 | 0 | 9.566707   | 1.155897  | -0.439984 |
| 45 | 1 | 0 | 10.101272  | 2.055856  | -0.733015 |
| 46 | 6 | 0 | 8.177682   | 1.166484  | -0.441171 |
| 47 | 1 | 0 | 7.631752   | 2.056997  | -0.738270 |
| 48 | 6 | 0 | 12.631855  | -1.377196 | -0.275987 |
| 49 | 6 | 0 | 12.373570  | -2.203874 | -1.402488 |
| 50 | 6 | 0 | 13.047745  | -3.420826 | -1.552626 |
| 51 | 1 | 0 | 12.848998  | -4.026159 | -2.435736 |
| 52 | 6 | 0 | 13.964445  | -3.882084 | -0.607064 |
| 53 | 6 | 0 | 14.205968  | -3.075861 | 0.507712  |
| 54 | 1 | 0 | 14.912400  | -3.415091 | 1.263533  |
| 55 | 6 | 0 | 13.576299  | -1.839706 | 0.680952  |
| 56 | 6 | 0 | 11.392924  | -1.816412 | -2.495402 |
| 57 | 1 | 0 | 11.642799  | -2.325958 | -3.432112 |
| 58 | 1 | 0 | 11.384164  | -0.741362 | -2.696397 |
| 59 | 1 | 0 | 10.365514  | -2.095897 | -2.233583 |
| 60 | 6 | 0 | 14.695814  | -5.189831 | -0.797263 |
| 61 | 1 | 0 | 14.135121  | -5.872526 | -1.444498 |
| 62 | 1 | 0 | 14.870549  | -5.694807 | 0.159257  |
| 63 | 1 | 0 | 15.678139  | -5.032212 | -1.262955 |
| 64 | 6 | 0 | 13.905889  | -1.051304 | 1.932819  |
| 65 | 1 | 0 | 14.696619  | -1.546968 | 2.504889  |
| 66 | 1 | 0 | 13.036982  | -0.958541 | 2.596766  |
| 67 | 1 | 0 | 14.241372  | -0.036376 | 1.700804  |
| 68 | 6 | 0 | 12.642937  | 1.381244  | 0.083453  |
| 69 | 6 | 0 | 13.582423  | 1.834347  | -0.882867 |
| 70 | 6 | 0 | 14.225603  | 3.064488  | -0.716205 |
| 71 | 1 | 0 | 14.933241  | 3.393747  | -1.475316 |
| 72 | 6 | 0 | 13.999155  | 3.875744  | 0.397936  |
| 73 | 6 | 0 | 13.093533  | 3.419797  | 1.356751  |
| 74 | 1 | 0 | 12.916139  | 4.022602  | 2.246104  |
| 75 | 6 | 0 | 12.405814  | 2.209644  | 1.213532  |
| 76 | 6 | 0 | 13.898985  | 1.038896  | -2.133628 |
| 77 | 1 | 0 | 13.023436  | 0.943009  | -2.788250 |
| 78 | 1 | 0 | 14.236240  | 0.024981  | -1.899744 |
| 79 | 1 | 0 | 14.684060  | 1.531257  | -2.716252 |
| 80 | 6 | 0 | 14.698757  | 5.205563  | 0.550081  |
| 81 | 1 | 0 | 14.147606  | 6.005851  | 0.037646  |
| 82 | 1 | 0 | 15.705759  | 5.180854  | 0.119200  |
| 83 | 1 | 0 | 14.786265  | 5.494756  | 1.602771  |
| 84 | 6 | 0 | 11.439602  | 1.828162  | 2.321401  |
| 85 | 1 | 0 | 11.708874  | 2.334008  | 3.254744  |
| 86 | 1 | 0 | 11.424184  | 0.753010  | 2.520910  |
| 87 | 1 | 0 | 10.410791  | 2.117495  | 2.076358  |
| 88 | 5 | 0 | -11.879052 | -0.025389 | 0.082941  |
| 89 | 5 | 0 | 0.006393   | -1.451128 | 0.728796  |
| 90 | 7 | 0 | -1.264174  | -0.651646 | 0.186023  |
| 91 | 7 | 0 | -1.271699  | 0.664170  | -0.161796 |
| 92 | 6 | 0 | 0.022406   | -2.951159 | 0.104723  |
| 93 | 1 | 0 | -0.828269  | -3.508653 | 0.525863  |

|     |   |   |            |           |           |
|-----|---|---|------------|-----------|-----------|
| 94  | 1 | 0 | 0.904457   | -3.489000 | 0.487975  |
| 95  | 6 | 0 | 0.006599   | -3.067895 | -1.430538 |
| 96  | 1 | 0 | -0.907964  | -2.602672 | -1.827210 |
| 97  | 1 | 0 | 0.839711   | -2.483121 | -1.845730 |
| 98  | 6 | 0 | 0.106785   | -4.503566 | -1.976461 |
| 99  | 1 | 0 | 1.026352   | -4.971225 | -1.594961 |
| 100 | 1 | 0 | 0.219890   | -4.458706 | -3.068623 |
| 101 | 6 | 0 | -1.092970  | -5.397028 | -1.640350 |
| 102 | 1 | 0 | -2.027447  | -4.958402 | -2.013684 |
| 103 | 1 | 0 | -0.987640  | -6.388492 | -2.095955 |
| 104 | 1 | 0 | -1.203023  | -5.542966 | -0.559813 |
| 105 | 6 | 0 | -0.068277  | -1.377651 | 2.361304  |
| 106 | 1 | 0 | -1.031154  | -1.820028 | 2.664878  |
| 107 | 1 | 0 | -0.122833  | -0.323808 | 2.680046  |
| 108 | 6 | 0 | 1.044581   | -2.073712 | 3.161513  |
| 109 | 1 | 0 | 1.112137   | -3.131964 | 2.867963  |
| 110 | 1 | 0 | 2.020582   | -1.627612 | 2.918933  |
| 111 | 6 | 0 | 0.846854   | -1.998710 | 4.683185  |
| 112 | 1 | 0 | -0.122281  | -2.448502 | 4.942420  |
| 113 | 1 | 0 | 0.781217   | -0.943842 | 4.985612  |
| 114 | 6 | 0 | 1.960437   | -2.690289 | 5.476483  |
| 115 | 1 | 0 | 2.937688   | -2.238237 | 5.265258  |
| 116 | 1 | 0 | 1.788292   | -2.618855 | 6.556776  |
| 117 | 1 | 0 | 2.027790   | -3.755213 | 5.220497  |
| 118 | 6 | 0 | -2.546307  | 1.070021  | -0.255490 |
| 119 | 1 | 0 | -2.785215  | 2.082394  | -0.540050 |
| 120 | 6 | 0 | -2.533507  | -1.063254 | 0.314491  |
| 121 | 1 | 0 | -2.758461  | -2.074607 | 0.616017  |
| 122 | 6 | 0 | -3.406208  | 0.000305  | 0.039372  |
| 123 | 6 | 0 | -4.819023  | -0.002697 | 0.055211  |
| 124 | 6 | 0 | -6.035075  | -0.004364 | 0.066822  |
| 125 | 6 | 0 | -7.458065  | -0.007134 | 0.076893  |
| 126 | 6 | 0 | -8.182900  | 1.107611  | -0.392950 |
| 127 | 1 | 0 | -7.641541  | 1.972342  | -0.765016 |
| 128 | 6 | 0 | -9.571692  | 1.098619  | -0.372458 |
| 129 | 1 | 0 | -10.109332 | 1.974161  | -0.725862 |
| 130 | 6 | 0 | -10.306610 | -0.017370 | 0.085872  |
| 131 | 6 | 0 | -9.560627  | -1.125722 | 0.545284  |
| 132 | 1 | 0 | -10.090081 | -2.002905 | 0.907823  |
| 133 | 6 | 0 | -8.171857  | -1.125487 | 0.556012  |
| 134 | 1 | 0 | -7.621829  | -1.985355 | 0.926684  |
| 135 | 6 | 0 | -12.646763 | 1.361810  | 0.071836  |
| 136 | 6 | 0 | -12.454251 | 2.329965  | 1.089949  |
| 137 | 6 | 0 | -13.110380 | 3.567388  | 1.023956  |
| 138 | 1 | 0 | -12.952019 | 4.286850  | 1.826161  |
| 139 | 6 | 0 | -13.957316 | 3.900494  | -0.029527 |
| 140 | 6 | 0 | -14.150995 | 2.943291  | -1.032235 |
| 141 | 1 | 0 | -14.807696 | 3.178627  | -1.868311 |
| 142 | 6 | 0 | -13.529024 | 1.694766  | -0.997110 |
| 143 | 6 | 0 | -11.622387 | 2.068906  | 2.331614  |
| 144 | 1 | 0 | -12.272397 | 1.879899  | 3.196649  |
| 145 | 1 | 0 | -10.956862 | 1.210422  | 2.228983  |

|     |   |   |            |           |           |
|-----|---|---|------------|-----------|-----------|
| 146 | 1 | 0 | -11.006205 | 2.940397  | 2.581800  |
| 147 | 6 | 0 | -14.638356 | 5.246703  | -0.101027 |
| 148 | 1 | 0 | -14.511477 | 5.809759  | 0.829191  |
| 149 | 1 | 0 | -14.229904 | 5.857787  | -0.916645 |
| 150 | 1 | 0 | -15.713886 | 5.142155  | -0.288256 |
| 151 | 6 | 0 | -13.794563 | 0.741622  | -2.145229 |
| 152 | 1 | 0 | -14.529805 | 1.164900  | -2.837069 |
| 153 | 1 | 0 | -12.885880 | 0.537061  | -2.725476 |
| 154 | 1 | 0 | -14.174891 | -0.223002 | -1.796220 |
| 155 | 6 | 0 | -12.635723 | -1.417946 | 0.071501  |
| 156 | 6 | 0 | -13.583857 | -1.742351 | 1.082354  |
| 157 | 6 | 0 | -14.217592 | -2.986715 | 1.079545  |
| 158 | 1 | 0 | -14.924823 | -3.217994 | 1.874362  |
| 159 | 6 | 0 | -13.978731 | -3.939203 | 0.084186  |
| 160 | 6 | 0 | -13.061522 | -3.614585 | -0.914106 |
| 161 | 1 | 0 | -12.863993 | -4.334875 | -1.706618 |
| 162 | 6 | 0 | -12.381332 | -2.390210 | -0.930528 |
| 163 | 6 | 0 | -13.914850 | -0.783209 | 2.208494  |
| 164 | 1 | 0 | -13.028640 | -0.523536 | 2.800001  |
| 165 | 1 | 0 | -14.334074 | 0.155280  | 1.832227  |
| 166 | 1 | 0 | -14.644039 | -1.227702 | 2.893436  |
| 167 | 6 | 0 | -14.709863 | -5.260880 | 0.081700  |
| 168 | 1 | 0 | -14.238551 | -5.978234 | -0.597994 |
| 169 | 1 | 0 | -14.733595 | -5.707714 | 1.082494  |
| 170 | 1 | 0 | -15.752914 | -5.138996 | -0.239636 |
| 171 | 6 | 0 | -11.397882 | -2.168396 | -2.066531 |
| 172 | 1 | 0 | -11.727891 | -2.698591 | -2.966720 |
| 173 | 1 | 0 | -11.274625 | -1.114849 | -2.327524 |
| 174 | 1 | 0 | -10.400599 | -2.548300 | -1.812518 |

-----  
Energy (HF) = -3193.8347488 Hartree.

#### BODIPY 4.

Standard orientation:

| Center<br>Number | Atomic<br>Number | Atomic<br>Type | Coordinates (Angstroms) |           |           |
|------------------|------------------|----------------|-------------------------|-----------|-----------|
|                  |                  |                | X                       | Y         | Z         |
| 1                | 6                | 0              | 5.156151                | -2.350697 | -1.026582 |
| 2                | 1                | 0              | 4.116269                | -2.625583 | -1.136094 |
| 3                | 6                | 0              | 6.277940                | -3.103498 | -1.350924 |
| 4                | 1                | 0              | 6.304207                | -4.098543 | -1.773181 |
| 5                | 6                | 0              | 7.401393                | -2.319782 | -1.016234 |
| 6                | 1                | 0              | 8.453157                | -2.551200 | -1.118537 |
| 7                | 7                | 0              | 7.012177                | -1.139191 | -0.508350 |
| 8                | 5                | 0              | 7.958864                | 0.040198  | -0.085796 |

|    |   |   |           |           |           |
|----|---|---|-----------|-----------|-----------|
| 9  | 6 | 0 | 6.269670  | 3.007348  | 1.542490  |
| 10 | 6 | 0 | 5.149873  | 2.277297  | 1.163870  |
| 11 | 1 | 0 | 4.109310  | 2.533579  | 1.306886  |
| 12 | 6 | 0 | 5.619392  | 1.090927  | 0.548017  |
| 13 | 6 | 0 | 4.919030  | -0.012390 | 0.016559  |
| 14 | 6 | 0 | 5.622437  | -1.121915 | -0.497648 |
| 15 | 7 | 0 | 7.009019  | 1.113069  | 0.556330  |
| 16 | 9 | 0 | 8.878193  | -0.398681 | 0.846432  |
| 17 | 6 | 0 | 7.395149  | 2.254328  | 1.149361  |
| 18 | 1 | 0 | 8.446309  | 2.481924  | 1.265433  |
| 19 | 9 | 0 | 8.577374  | 0.568991  | -1.203355 |
| 20 | 1 | 0 | 6.293341  | 3.964103  | 2.045635  |
| 21 | 6 | 0 | 3.505142  | -0.013820 | 0.016560  |
| 22 | 6 | 0 | 2.286852  | -0.012100 | 0.013556  |
| 23 | 6 | 0 | 0.866340  | -0.009092 | 0.010076  |
| 24 | 6 | 0 | 0.147789  | -1.126511 | -0.464814 |
| 25 | 6 | 0 | 0.150771  | 1.111863  | 0.481167  |
| 26 | 1 | 0 | 0.693050  | -1.991079 | -0.831226 |
| 27 | 6 | 0 | -1.241049 | -1.118903 | -0.450482 |
| 28 | 6 | 0 | -1.237972 | 1.111260  | 0.459277  |
| 29 | 1 | 0 | 0.698382  | 1.973896  | 0.850045  |
| 30 | 1 | 0 | -1.778109 | -1.995621 | -0.802532 |
| 31 | 6 | 0 | -1.975904 | -0.001926 | 0.002281  |
| 32 | 1 | 0 | -1.772501 | 1.990728  | 0.808298  |
| 33 | 5 | 0 | -3.553451 | 0.001949  | -0.002494 |
| 34 | 6 | 0 | -4.310550 | -1.380393 | 0.129297  |
| 35 | 6 | 0 | -4.303003 | 1.387809  | -0.138889 |
| 36 | 6 | 0 | -4.047403 | -2.260013 | 1.213199  |
| 37 | 6 | 0 | -5.263527 | -1.792766 | -0.843610 |
| 38 | 6 | 0 | -5.268489 | 1.800805  | 0.821920  |
| 39 | 6 | 0 | -4.025709 | 2.267467  | -1.219149 |
| 40 | 6 | 0 | -4.722617 | -3.481969 | 1.308276  |
| 41 | 6 | 0 | -3.062758 | -1.926461 | 2.320204  |
| 42 | 6 | 0 | -5.891996 | -3.035436 | -0.727086 |
| 43 | 6 | 0 | -5.607071 | -0.940325 | -2.049475 |
| 44 | 6 | 0 | -5.892889 | 3.044597  | 0.698890  |
| 45 | 6 | 0 | -5.635263 | 0.944619  | 2.018204  |
| 46 | 6 | 0 | -4.697226 | 3.491189  | -1.321079 |
| 47 | 6 | 0 | -3.034857 | 1.930316  | -2.319600 |
| 48 | 1 | 0 | -4.520848 | -4.129181 | 2.160268  |
| 49 | 6 | 0 | -5.644162 | -3.895686 | 0.345973  |
| 50 | 1 | 0 | -3.329465 | -2.454959 | 3.241548  |
| 51 | 1 | 0 | -3.027879 | -0.858100 | 2.551334  |
| 52 | 1 | 0 | -2.041479 | -2.226060 | 2.055726  |
| 53 | 1 | 0 | -6.603054 | -3.337882 | -1.493927 |
| 54 | 1 | 0 | -6.364084 | -1.434040 | -2.666870 |
| 55 | 1 | 0 | -4.733969 | -0.762449 | -2.689535 |
| 56 | 1 | 0 | -5.995359 | 0.040560  | -1.759446 |
| 57 | 1 | 0 | -6.618607 | 3.344483  | 1.452989  |
| 58 | 6 | 0 | -5.625228 | 3.908376  | -0.366851 |
| 59 | 1 | 0 | -4.772480 | 0.756887  | 2.669265  |
| 60 | 1 | 0 | -6.026702 | -0.031871 | 1.717854  |

|    |   |   |           |           |           |
|----|---|---|-----------|-----------|-----------|
| 61 | 1 | 0 | -6.396956 | 1.441059  | 2.627620  |
| 62 | 1 | 0 | -4.488672 | 4.135773  | -2.173422 |
| 63 | 1 | 0 | -3.297256 | 2.455226  | -3.244248 |
| 64 | 1 | 0 | -2.997252 | 0.861305  | -2.546686 |
| 65 | 1 | 0 | -2.015409 | 2.232481  | -2.050950 |
| 66 | 6 | 0 | -6.373723 | -5.211929 | 0.472662  |
| 67 | 6 | 0 | -6.310619 | 5.249934  | -0.471060 |
| 68 | 1 | 0 | -5.843437 | -5.902121 | 1.136934  |
| 69 | 1 | 0 | -6.491732 | -5.700382 | -0.501125 |
| 70 | 1 | 0 | -7.381596 | -5.069527 | 0.885299  |
| 71 | 1 | 0 | -5.853584 | 5.982913  | 0.207252  |
| 72 | 1 | 0 | -7.370696 | 5.181195  | -0.201548 |
| 73 | 1 | 0 | -6.243925 | 5.656683  | -1.485291 |

-----  
Energy (HF) = -1712.0553432 Hartree.
